# Supplementary material
Source: Springer Nature journal article supplement (https://www.springermedizin.de/resource/supplementary/12877_2006_60_MOESM2_ESM.pdf/9441092)

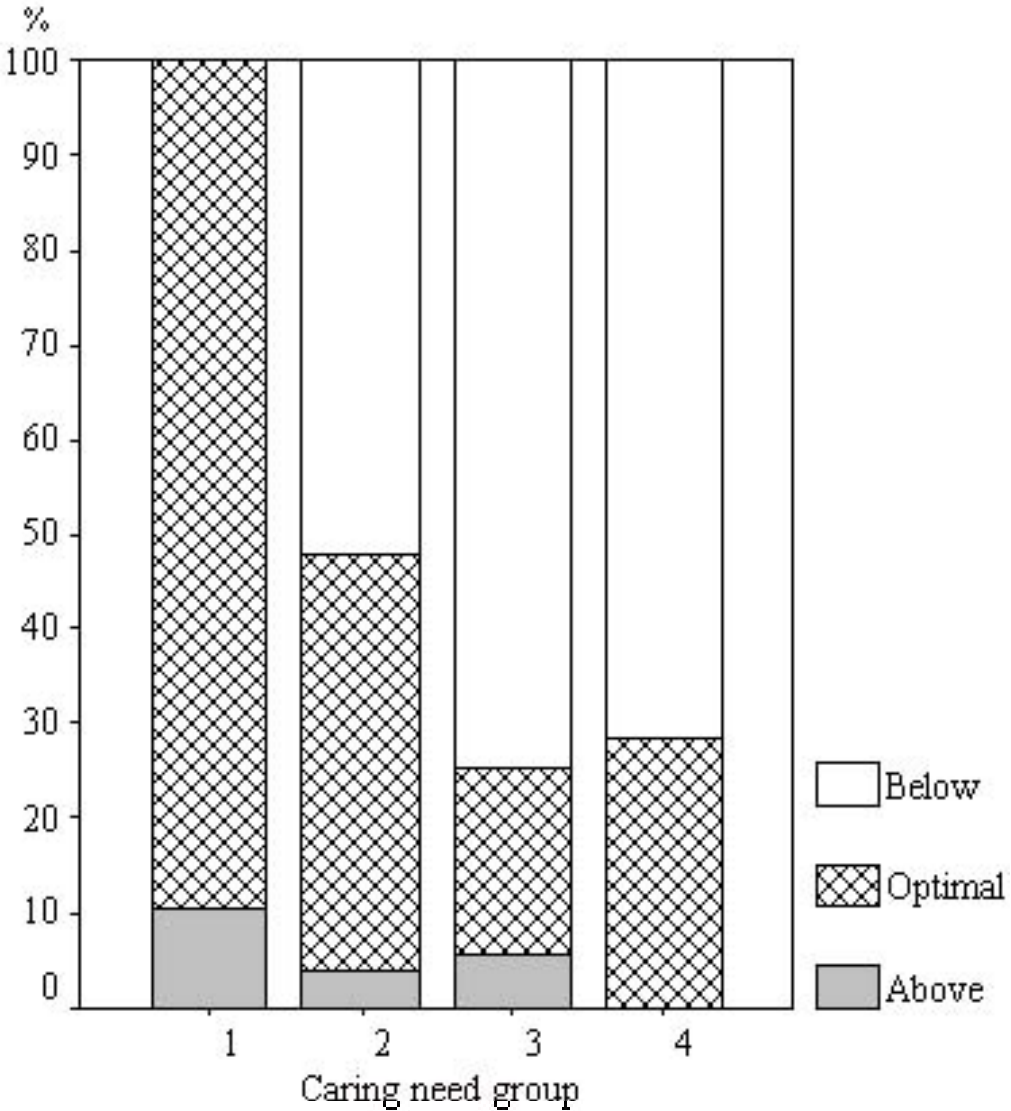

Supplement: MOESM2 [file 9441092]
